# Supplementary material for: An electric-field assisted growth control methodology for integrating ZnO nanorods with microstructures
Source: Royal Society of Chemistry journal article supplement (doi:10.1039/c4nr03184a), 2014-08-22
Supplement: c4nr03184a1.pdf [file c4nr03184a1.pdf]

## Electric Supplementary Information

### An electric-field assisted growth control methodology for integrating ZnO nanorods with micro structures

X. Zong and R. Zhu\*

#### Simulation Results of Electric Field

Figure S1 (magnified graph of Figure 4 in the manuscript) is the Simulation results of the  $y$  and  $x$  components of electric field vector. Fig. S1(a), S1(c), S1(e) and S1(g) show  $y$  components of electric field intensity ( $E_y$ ) under different conditions. Fig. S1(b), S1(d), S1(f) and S1(h) show  $x$  components of electric field intensity ( $E_x$ ) (corresponding to (a), (c), (e) and (g)). The coordinate system is defined in Fig. S1(a) and the schematic of 2-D model in  $x$ - $y$  plane is shown in Fig. S1(c). The definition of output parameters ( $y_1, y_2, y_3, y_4, y_5$ ) are illustrated in Fig. S1(a) and S1(b). The legend on the right side of Fig. S1(b) shows the specific time in one period ( $T$ ) for each color.

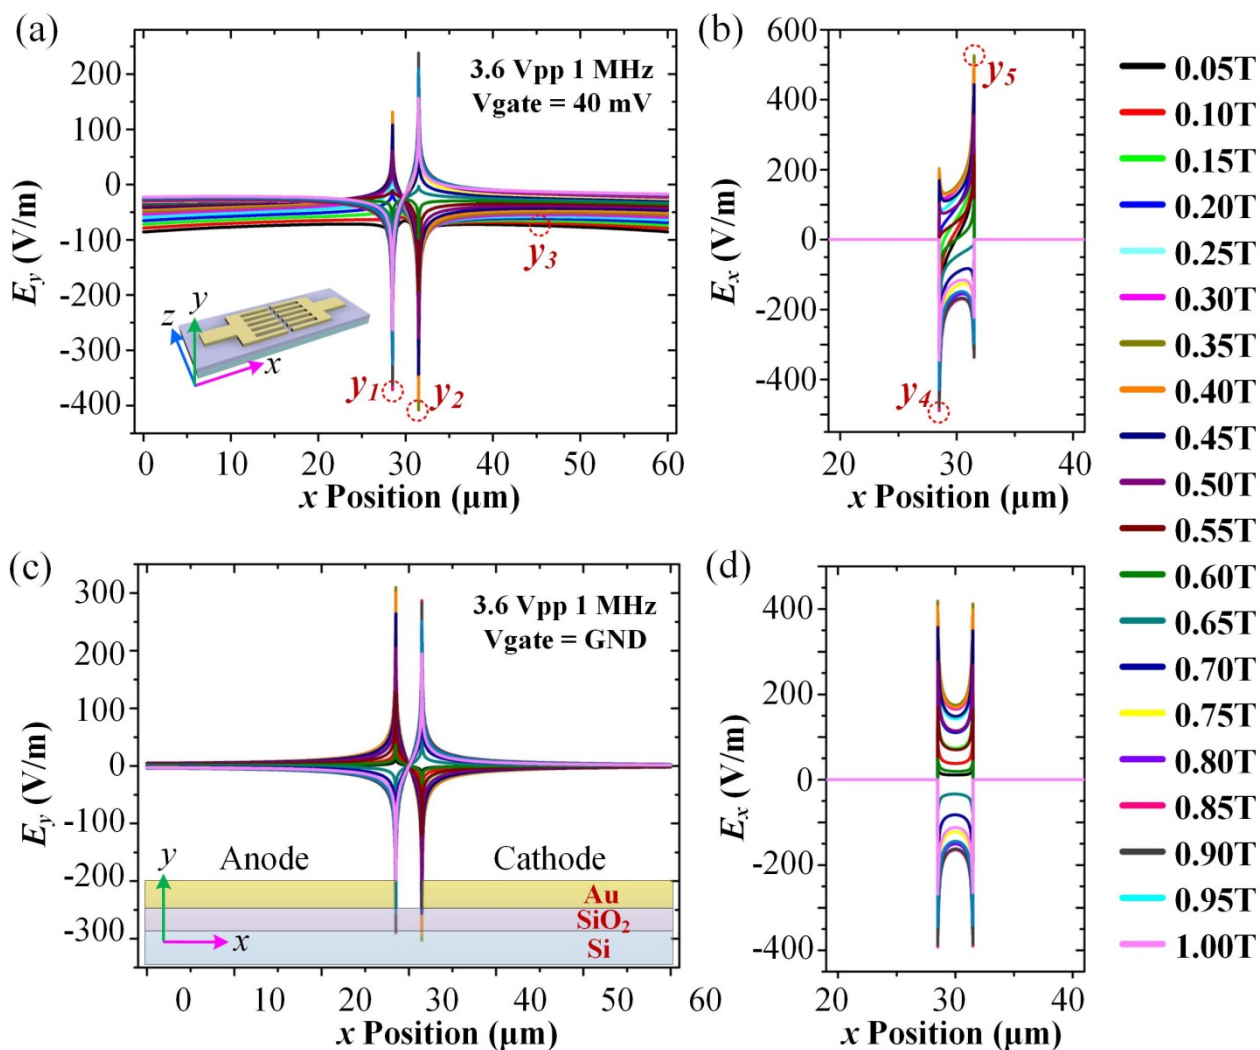

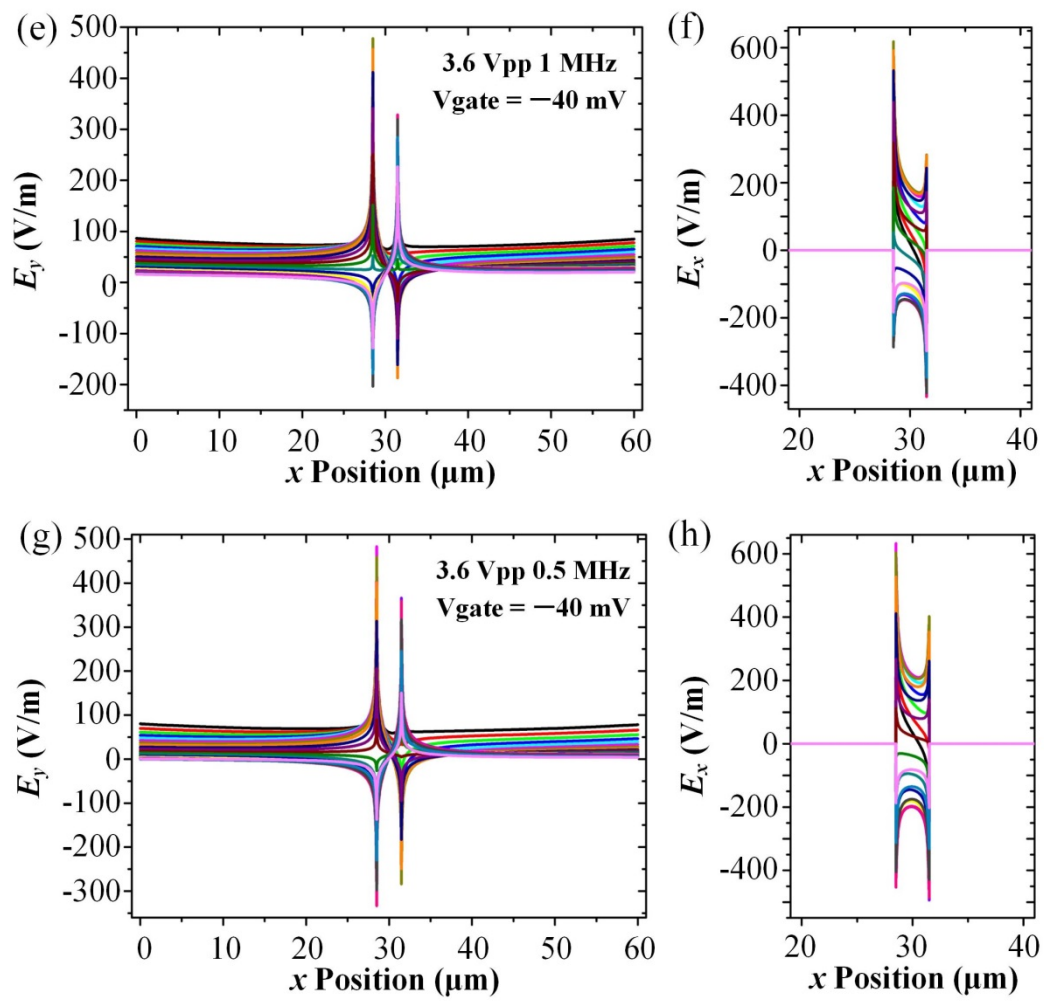

Fig. S1 Magnified graph of Figure 4 in the manuscript.
